# Supplementary material for: Non-linear optical properties of polystyrene and polyvinyl alcohol composites with 4-methoxy-1-naphthol
Source: publisher site journal article supplement (doi:10.1515/zpch-2019-1594), 2020-10-26
Supplement: Supplementary file 1 [file j_zpch-2019-1594_suppl.docx]

| 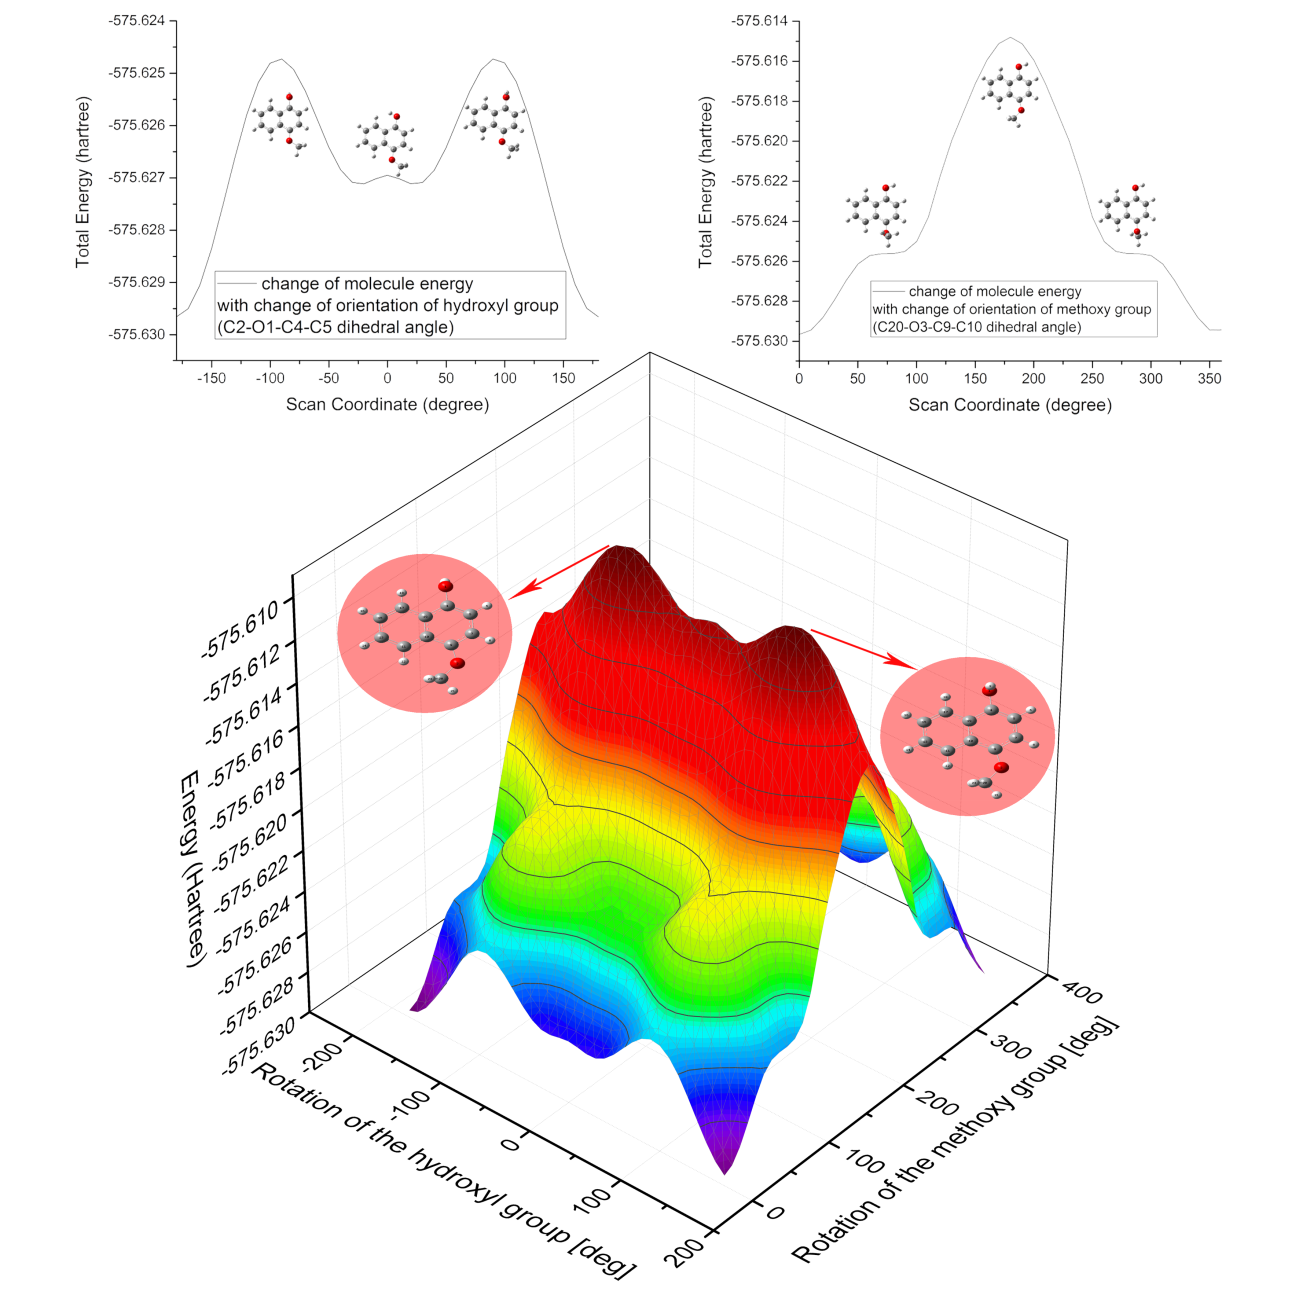 |
| --- |
| Figure S1. Energy scan associated with simultaneous rotation of hydroxyl and methoxy groups (the lower part) and energy scans for each of tested substituents separately (the upper part) |

| Table S1. Optimized parameters of 4-methoxy-1-naphthol molecule for several calculation methods with the comparison with experimental data; bond lengths in Å, valence angles in °; hydrogen atoms are omitted | | | | | | | | | | | | | | | | | |
| --- | --- | --- | --- | --- | --- | --- | --- | --- | --- | --- | --- | --- | --- | --- | --- | --- | --- |
| Parameter | Calculation method | | | | | | | | | | | | | | | | Exp. value [q] |
| HF | | | | MP2 | | | | SVWN | | | | B3LYP | | | |
| 6-31G(d) | Δ [Å] / Δ [°] | 6-311  +G(3d,2p) | Δ [Å] / Δ [°] | 6-31G(d) | Δ [Å] / Δ [°] | 6-311  +G(3d,2p) | Δ [Å] / Δ [°] | 6-31G(d) | Δ [Å] / Δ [°] | 6-311  +G(3d,2p) | Δ [Å] / Δ [°] | 6-31G(d) | Δ [Å] / Δ [°] | 6-311  +G(3d,2p) | Δ [Å] / Δ [°] |
| O1-C4 | 1.357 | 0.029 | 1.354 | 0.032 | 1.378 | 0.008 | 1.374 | 0.012 | 1.355 | 0.031 | 1.353 | 0.033 | 1.373 | 0.013 | 1.372 | 0.014 | 1.386 |
| O3-C9 | 1.352 | 0.016 | 1.348 | 0.020 | 1.373 | 0.005 | 1.366 | 0.002 | 1.353 | 0.015 | 1.349 | 0.019 | 1.369 | 0.001 | 1.366 | 0.002 | 1.368 |
| O3-C20 | 1.397 | 0.026 | 1.396 | 0.027 | 1.423 | 0.000 | 1.420 | 0.003 | 1.396 | 0.027 | 1.397 | 0.026 | 1.416 | 0.007 | 1.417 | 0.006 | 1.423 |
| C4-C5 | 1.351 | 0.003 | 1.348 | 0.006 | 1.377 | 0.023 | 1.378 | 0.024 | 1.374 | 0.020 | 1.367 | 0.013 | 1.374 | 0.020 | 1.369 | 0.015 | 1.354 |
| C4-C19 | 1.430 | 0.007 | 1.428 | 0.005 | 1.424 | 0.001 | 1.422 | 0.001 | 1.418 | 0.005 | 1.414 | 0.009 | 1.429 | 0.006 | 1.425 | 0.002 | 1.423 |
| C5-C7 | 1.423 | 0.010 | 1.348 | 0.065 | 1.416 | 0.003 | 1.417 | 0.004 | 1.408 | 0.005 | 1.404 | 0.009 | 1.418 | 0.005 | 1.416 | 0.003 | 1.413 |
| C7-C9 | 1.355 | 0.002 | 1.352 | 0.005 | 1.381 | 0.024 | 1.383 | 0.026 | 1.377 | 0.020 | 1.371 | 0.014 | 1.378 | 0.021 | 1.374 | 0.017 | 1.357 |
| C9-C10 | 1.434 | 0.010 | 1.433 | 0.009 | 1.429 | 0.005 | 1.427 | 0.003 | 1.421 | 0.003 | 1.417 | 0.007 | 1.434 | 0.010 | 1.431 | 0.007 | 1.424 |
| C10-C11 | 1.416 | 0.001 | 1.415 | 0.002 | 1.417 | 0.000 | 1.416 | 0.001 | 1.406 | 0.011 | 1.402 | 0.015 | 1.418 | 0.001 | 1.415 | 0.002 | 1.417 |
| C10-C19 | 1.406 | 0.012 | 1.403 | 0.015 | 1.428 | 0.010 | 1.431 | 0.013 | 1.421 | 0.003 | 1.418 | 0.000 | 1.430 | 0.012 | 1.427 | 0.009 | 1.418 |
| C11-C13 | 1.362 | 0.005 | 1.360 | 0.003 | 1.381 | 0.024 | 1.383 | 0.026 | 1.376 | 0.019 | 1.371 | 0.014 | 1.379 | 0.022 | 1.375 | 0.018 | 1.357 |
| C13-C15 | 1.411 | 0.015 | 1.409 | 0.013 | 1.412 | 0.016 | 1.412 | 0.016 | 1.405 | 0.009 | 1.400 | 0.004 | 1.413 | 0.017 | 1.410 | 0.014 | 1.396 |
| C15-C17 | 1.361 | 0.001 | 1.359 | 0.001 | 1.381 | 0.021 | 1.382 | 0.022 | 1.376 | 0.016 | 1.370 | 0.010 | 1.378 | 0.018 | 1.374 | 0.014 | 1.360 |
| C17-C19 | 1.416 | 0.004 | 1.414 | 0.002 | 1.416 | 0.004 | 1.416 | 0.004 | 1.407 | 0.005 | 1.403 | 0.009 | 1.418 | 0.006 | 1.416 | 0.004 | 1.412 |
| max. |  | 0.029 |  | 0.065 |  | 0.024 |  | 0.026 |  | 0.031 |  | 0.033 |  | 0.022 |  | 0.018 |  |
| aver. |  | 0.176 |  | 0.185 |  | 0.126 |  | 0.127 |  | 0.143 |  | 0.136 |  | 0.113 |  | 0.118 |  |
| C9-O3-C20 | 119.3 | 2.2 | 119.4 | 2.3 | 116.4 | 0.7 | 116.3 | 0.8 | 116.5 | 0.6 | 116.6 | 0.5 | 118.0 | 0.9 | 118.2 | 1.1 | 117.1 |
| O1-C4-C5 | 123.6 | 1.2 | 123.6 | 1.2 | 123.5 | 1.1 | 123.4 | 1.0 | 123.7 | 1.3 | 123.5 | 1.1 | 123.3 | 0.9 | 123.2 | 0.8 | 122.4 |
| O1-C4-C19 | 116.3 | 0.3 | 116.4 | 0.2 | 116.0 | 0.6 | 116.2 | 0.4 | 116.2 | 0.4 | 116.4 | 0.2 | 116.4 | 0.2 | 116.5 | 0.1 | 116.6 |
| C5-C4-C19 | 120.2 | 0.8 | 120.1 | 0.9 | 120.4 | 0.6 | 120.3 | 0.7 | 120.1 | 0.9 | 120.1 | 0.9 | 120.3 | 0.7 | 120.3 | 0.7 | 121.0 |
| C4-C5-C7 | 121.0 | 0.6 | 121.0 | 0.6 | 120.9 | 0.5 | 120.9 | 0.5 | 121.0 | 0.6 | 121.0 | 0.6 | 121.0 | 0.6 | 121.0 | 0.6 | 120.4 |
| C5-C7-C9 | 120.5 | 0.0 | 120.6 | 0.1 | 120.1 | 0.4 | 120.2 | 0.3 | 120.2 | 0.3 | 120.2 | 0.3 | 120.4 | 0.1 | 120.4 | 0.1 | 120.5 |
| O3-C9-C7 | 125.1 | 0.4 | 125.1 | 0.4 | 125.0 | 0.3 | 124.8 | 0.1 | 124.5 | 0.2 | 124.3 | 0.4 | 124.8 | 0.1 | 124.6 | 0.1 | 124.7 |
| O3-C9-C10 | 114.9 | 0.3 | 115.1 | 0.5 | 114.6 | 0.0 | 115.1 | 0.5 | 115.2 | 0.6 | 115.5 | 0.9 | 115.1 | 0.5 | 115.3 | 0.7 | 114.6 |
| C7-C9-C10 | 119.9 | 0.7 | 119.8 | 0.8 | 120.3 | 0.3 | 120.1 | 0.5 | 120.2 | 0.4 | 120.2 | 0.4 | 120.1 | 0.5 | 120.1 | 0.5 | 120.6 |
| C9-C10-C11 | 121.6 | 0.8 | 121.6 | 0.8 | 121.6 | 0.8 | 121.6 | 0.8 | 121.6 | 0.8 | 121.7 | 0.7 | 121.9 | 0.5 | 121.9 | 0.5 | 122.4 |
| C9-C10-C19 | 119.4 | 0.5 | 119.5 | 0.6 | 119.2 | 0.3 | 119.4 | 0.5 | 119.3 | 0.4 | 119.3 | 0.4 | 119.3 | 0.4 | 119.3 | 0.4 | 118.9 |
| C11-C10-C19 | 119.0 | 0.3 | 118.9 | 0.2 | 119.0 | 0.3 | 119.0 | 0.3 | 119.1 | 0.4 | 119.0 | 0.3 | 118.8 | 0.1 | 118.8 | 0.1 | 118.7 |
| C10-C11-C13 | 120.5 | 0.1 | 120.6 | 0.0 | 120.4 | 0.2 | 120.5 | 0.1 | 120.5 | 0.1 | 120.6 | 0.0 | 120.7 | 0.1 | 120.8 | 0.2 | 120.6 |
| C11-C13-C15 | 120.4 | 0.3 | 120.4 | 0.3 | 120.5 | 0.2 | 120.5 | 0.2 | 120.4 | 0.3 | 120.4 | 0.3 | 120.4 | 0.3 | 120.4 | 0.3 | 120.7 |
| C13-C15-C17 | 120.3 | 0.1 | 120.2 | 0.2 | 120.4 | 0.0 | 120.3 | 0.1 | 120.3 | 0.1 | 120.3 | 0.1 | 120.3 | 0.1 | 120.3 | 0.1 | 120.4 |
| C15-C17-C19 | 120.4 | 0.4 | 120.5 | 0.3 | 120.3 | 0.5 | 120.4 | 0.4 | 120.4 | 0.4 | 120.5 | 0.3 | 120.6 | 0.2 | 120.7 | 0.1 | 120.8 |
| C4-C19-C10 | 119.0 | 0.4 | 119.1 | 0.5 | 118.9 | 0.3 | 119.0 | 0.4 | 119.2 | 0.6 | 119.1 | 0.5 | 119.0 | 0.4 | 119.0 | 0.4 | 118.6 |
| C4-C19-C17 | 121.6 | 1.1 | 121.5 | 1.2 | 121.7 | 1.0 | 121.7 | 1.0 | 121.5 | 1.2 | 121.6 | 1.1 | 121.9 | 0.8 | 121.9 | 0.8 | 122.7 |
| C10-C19-C17 | 119.4 | 0.7 | 119.3 | 0.6 | 119.4 | 0.7 | 119.3 | 0.6 | 119.3 | 0.6 | 119.3 | 0.6 | 119.2 | 0.5 | 119.1 | 0.4 | 118.7 |
| max. |  | 2.2 |  | 2.3 |  | 1.1 |  | 1.0 |  | 1.3 |  | 1.1 |  | 0.9 |  | 1.1 |  |
| aver. |  | 0.0035 |  | 0.0060 |  | 0.0037 |  | 0.0039 |  | 0.0043 |  | 0.0041 |  | 0.0036 |  | 0.0029 |  |

| Table S2 Components of dipole moment, polarizability, first and second order hyperpolarizability tensors for 4M1N molecule calculated with B3LYP method in both tested basis sets | | | | | |
| --- | --- | --- | --- | --- | --- |
| Tensor component | Static | | Dynamic | Dynamic | Dynamic |
| 266 nm | 532 nm | 1064 nm |
| B3LYP/6-31G(d) | | | | | |
| μx [Debye] | | -1.0166 | | | |
| μy [Debye] | | -1.6485 | | | |
| μz [Debye] | | -1.4262 | | | |
| **μ [Debye]** | | **2.4053** | | | |
| αxx·10-24 esu | | 20.7060 | 21.2900 | 22.4828 | 21.0775 |
| αyy·10-24 esu | | 15.4699 | 19.9831 | 16.6798 | 15.7336 |
| αzz·10-24 esu | | 17.6567 | 22.3559 | 19.0549 | 17.9607 |
| αxy·10-24 esu | | 5.1066 | 6.5386 | 5.8079 | 5.2547 |
| αxz·10-24 esu | | -2.1044 | -0.4385 | -2.2640 | -2.1340 |
| αyz·10-24 esu | | 7.6267 | 11.9006 | 8.6002 | 7.8390 |
| **<α>·10-24 esu** | | **17.9442** | **21.2097** | **19.4058** | **18.2573** |
| βxxx·10-30 esu | | -0.1011 | 6.4861 | 0.4967 | -0.0223 |
| βxxy·10-30 esu | | 0.2634 | 18.4923 | 1.0682 | 0.3736 |
| βxyy·10-30 esu | | 0.1252 | 3.5897 | 0.4231 | 0.1729 |
| βyyy·10-30 esu | | -0.1081 | 1.0710 | 0.2347 | -0.0624 |
| βxxz·10-30 esu | | 0.0952 | 18.6573 | 0.6633 | 0.1637 |
| βxyz·10-30 esu | | 0.1553 | 0.7457 | 0.0848 | 0.1752 |
| βyyz·10-30 esu | | 0.3702 | 2.0290 | 0.7427 | 0.4366 |
| βxzz·10-30 esu | | -0.1949 | -6.0320 | -0.4012 | -0.2251 |
| βyzz·10-30 esu | | 0.3111 | -0.4289 | 0.6563 | 0.3736 |
| βzzz·10-30 esu | | 0.2244 | 2.7369 | 0.7495 | 0.3042 |
| βx·10-30 esu | | -0.1708 | 4.0438 | 0.5187 | -0.0745 |
| βy·10-30 esu | | 0.4664 | 19.1343 | 1.9592 | 0.6848 |
| βz·10-30 esu | | 0.6898 | 23.4232 | 2.1554 | 0.9046 |
| **βt·10-30 esu** | | **0.8500** | **30.5143** | **2.9586** | **1.1370** |
| γxxxx·10-36 esu | | 7.7693 | 17.2710 | 12.4524 | 8.5554 |
| γxxyx·10-36 esu | | 2.1135 | -13.4965 | 4.2173 | 2.3883 |
| γxxyy·10-36 esu | | 1.3576 | -47.7452 | 3.9122 | 1.6287 |
| γyxyy·10-36 esu | | 1.6263 | 2.8092 | 2.9259 | 1.8281 |
| γyyyy·10-36 esu | | 3.2782 | 24.0336 | 5.2247 | 3.6424 |
| γxxzx·10-36 esu | | -1.3714 | -25.6314 | -1.3622 | -1.4502 |
| γxxzy·10-36 esu | | 0.1547 | -52.6971 | 1.9187 | 0.3012 |
| γzyzy·10-36 esu | | 0.7780 | 27.0599 | 4.0366 | 2.8601 |
| γzzzy·10-36 esu | | 2.3759 | 17.1008 | 4.3229 | 2.8653 |
| γxxzz·10-36 esu | | 1.5031 | -49.4230 | 3.8779 | 1.7757 |
| γyxzz·10-36 esu | | 1.0520 | -8.8862 | 2.1422 | 1.2154 |
| γyyzz·10-36 esu | | 2.5789 | 17.3559 | 4.3215 | 2.8933 |
| γzxzz·10-36 esu | | 0.5417 | 18.4049 | 0.4747 | 0.5917 |
| γzyzz·10-36 esu | | 2.5650 | 26.9047 | 4.0653 | 2.8550 |
| γzzzz·10-36 esu | | 3.0867 | 23.2477 | 5.0405 | 3.4328 |
| **γ·10-36 esu** | | **5.0026** | **-19.0145** | **9.3881** | **5.6451** |
| B3LYP/6-311+G(3d,2p) | | | | | |
| μx [Debye] | | -1.1272 | | | |
| μy [Debye] | | -1.6096 | | | |
| μz [Debye] | | -1.3111 | | | |
| **μ [Debye]** | | **2.3623** | | | |
| αxx·10-24 esu | | 23.8174 | 27.7172 | 25.9817 | 24.2631 |
| αyy·10-24 esu | | 19.5141 | 28.9496 | 21.1820 | 19.8741 |
| αzz·10-24 esu | | 21.1444 | 30.9176 | 22.9802 | 21.5396 |
| αxy·10-24 esu | | 4.7291 | 7.5448 | 5.5444 | 4.8959 |
| αxz·10-24 esu | | -1.4907 | 0.9997 | -1.5835 | -1.5045 |
| αyz·10-24 esu | | 6.8070 | 14.0774 | 7.9518 | 7.0503 |
| **<α>·10-24 esu** | | **21.4920** | **29.1948** | **23.3813** | **21.8923** |
| βxxx·10-30 esu | | 0.1861 | -0.3416 | 1.1125 | 0.3115 |
| βxxy·10-30 esu | | 0.3108 | 11.5989 | 1.4191 | 0.4537 |
| βxyy·10-30 esu | | 0.1510 | 5.6858 | 0.5368 | 0.2082 |
| βyyy·10-30 esu | | 0.1161 | -10.2029 | 0.5078 | 0.1733 |
| βxxz·10-30 esu | | 0.1223 | 10.0025 | 0.8605 | 0.2058 |
| βxyz·10-30 esu | | 0.0858 | 8.2903 | 0.2513 | 0.1080 |
| βyyz·10-30 esu | | 0.3300 | -1.4336 | 0.7541 | 0.3995 |
| βxzz·10-30 esu | | -0.1307 | -6.7517 | -0.4568 | -0.1733 |
| βyzz·10-30 esu | | 0.3257 | 4.5058 | 0.7343 | 0.3952 |
| βzzz·10-30 esu | | 0.3639 | -3.5893 | 1.0181 | 0.4633 |
| βx·10-30 esu | | 0.2064 | -1.4075 | 1.1925 | 0.3464 |
| βy·10-30 esu | | 0.7526 | 5.9018 | 2.6612 | 1.0222 |
| βz·10-30 esu | | 0.8162 | 4.9797 | 2.6327 | 1.0685 |
| **βt·10-30 esu** | | **1.1292** | **7.8491** | **3.9288** | **1.5188** |
| γxxxx·10-36 esu | | 17.8399 | 232.4580 | 28.2537 | 19.7781 |
| γxxyx·10-36 esu | | 2.4081 | 133.8340 | 5.2671 | 2.7265 |
| γxxyy·10-36 esu | | 4.8330 | 56.6269 | 9.8939 | 5.4910 |
| γyxyy·10-36 esu | | 2.8165 | -131.8820 | 5.7960 | 3.2755 |
| γyyyy·10-36 esu | | 19.6342 | 930.1770 | 30.4772 | 22.0642 |
| γxxzx·10-36 esu | | 0.4573 | 231.7020 | 1.7790 | 0.6344 |
| γxxzy·10-36 esu | | 0.4854 | 55.5743 | 3.1005 | 0.6819 |
| γzyzy·10-36 esu | | 0.2326 | -206.4390 | 9.0230 | 6.6381 |
| γzzzy·10-36 esu | | 4.5731 | 256.6410 | 7.2523 | 4.7022 |
| γxxzz·10-36 esu | | 5.5801 | 139.5320 | 11.0513 | 6.3791 |
| γyxzz·10-36 esu | | 1.6965 | -73.3354 | 3.9562 | 2.0331 |
| γyyzz·10-36 esu | | 5.9926 | 36.1732 | 9.7634 | 6.7141 |
| γzxzz·10-36 esu | | 2.6877 | 132.3520 | 4.0990 | 3.1061 |
| γzyzz·10-36 esu | | 4.1759 | 33.5189 | 7.5061 | 4.7909 |
| γzzzz·10-36 esu | | 17.5374 | 206.7950 | 26.6208 | 19.5815 |
| **γ·10-36 esu** | | **17.5646** | **366.8188** | **29.3538** | **19.7184** |

| Table S3. Dipole moment, polarizability, first and second order hyperpolarizability tensors for naphthalene molecule (D2h point group) calculated with  B3LYP/6-31G(d) method. | | | | |
| --- | --- | --- | --- | --- |
| Tensor component | Static | Dynamic | Dynamic | Dynamic |
| 266 nm | 532 nm | 1064 nm |
| B3LYP/6-31G(d) | | | | |
| μx [Debye] | 0 | | | |
| μy [Debye] | 0 | | | |
| μz [Debye] | 0 | | | |
| **μ [Debye]** | **0** | | | |
| **<α>·10-24 esu** | **14.6564** | **17.4470** | **15.7180** | **14.8937** |
| βx·10-30 esu | 0 | 0 | 0 | 0 |
| βy·10-30 esu | 0 | 0 | 0 | 0 |
| βz·10-30 esu | 0 | 0 | 0 | 0 |
| **βt·10-30 esu** | **0** | **0** | **0** | **0** |
| **γ·10-36 esu** | **2.6735** | **29.9180** | **3.7604** | **2.9168** |

| Table S4. Dipole moment, polarizability, first and second order hyperpolarizability tensors for urea molecule calculated with B3LYP/6-31G(d) method | | | | |
| --- | --- | --- | --- | --- |
| Tensor component | Static | Dynamic | Dynamic | Dynamic |
| 266 nm | 532 nm | 1064 nm |
| B3LYP/6-31G(d) | | | | |
| μx [Debye] | 4.64357 | | | |
| μy [Debye] | 0.00394 | | | |
| μz [Debye] | 2.91885 | | | |
| **μ [Debye]** | **5.48475** | | | |
| **<α>·10-24 esu** | **4.0329** | **4.8197** | **4.1767** | **4.0667** |
| βx·10-30 esu | 0.7465 | 1.8090 | 0.8612 | 0.7800 |
| βy·10-30 esu | 0.0024 | 0.0062 | 0.0030 | 0.0026 |
| βz·10-30 esu | 0.6831 | 1.4013 | 0.7875 | 0.7133 |
| **βt·10-30 esu** | **1.0119** | **2.2883** | **1.1670** | **1.0570** |
| **γ·10-36 esu** | **0.6652** | **2.9211** | **0.8638** | **0.7103** |

| Table S5. Components of dipole moment, polarizability, first and second order hyperpolarizability tensors for 4M1N molecule calculated with B3LYP method in 6-311+G(3d,2p) basis set for PVA | | | | |
| --- | --- | --- | --- | --- |
| Tensor component | Static | Dynamic | Dynamic | Dynamic |
| 266 nm | 532 nm | 1064 nm |
| B3LYP/6-311+G(3d,2p) | | | | |
| μx [Debye] | 2.5719 | | | |
| μy [Debye] | 1.7650 | | | |
| μz [Debye] | 0.0004 | | | |
| **μ [Debye]** | **3.1193** | | | |
| αxx·10-24 esu | 36.3999 | 67.2590 | 45.2096 | 37.8184 |
| αyy·10-24 esu | 2.8980 | 27.3859 | 2.6547 | 3.0322 |
| αzz·10-24 esu | 34.6234 | 74.5457 | 41.1186 | 35.8033 |
| αxy·10-24 esu | 0.0000 | -0.0035 | -0.0002 | -0.0001 |
| αxz·10-24 esu | 0.0011 | 0.0039 | 0.0015 | 0.0012 |
| αyz·10-24 esu | 15.4554 | 13.2575 | 16.0518 | 15.5959 |
| **<α>·10-24 esu** | **24.6404** | **56.3969** | **29.6610** | **25.5513** |
| βxxx·10-30 esu | -4.2548 | -29.4286 | -27.3629 | -6.0641 |
| βxxy·10-30 esu | -0.6413 | -60.8899 | -13.4136 | -1.2559 |
| βxyy·10-30 esu | -0.4159 | -8.5684 | 7.2675 | -0.1624 |
| βyyy·10-30 esu | -3.6509 | -27.9914 | -15.5493 | -4.7780 |
| βxxz·10-30 esu | 0.0000 | -0.2819 | -0.0006 | 0.0000 |
| βxyz·10-30 esu | 0.0000 | -0.0469 | 0.0006 | 0.0001 |
| βyyz·10-30 esu | -0.0002 | 0.0263 | -0.0011 | -0.0003 |
| βxzz·10-30 esu | 0.2690 | -164.6990 | 0.4353 | 0.3054 |
| βyzz·10-30 esu | 0.0276 | -88.8399 | 0.0711 | 0.0311 |
| βzzz·10-30 esu | 0.0000 | 0.1102 | 0.0001 | 0.0000 |
| βx·10-30 esu | -4.4016 | -202.6960 | -19.6601 | -5.9211 |
| βy·10-30 esu | -4.2646 | -177.7212 | -28.8918 | -6.0028 |
| βz·10-30 esu | -0.0002 | -0.1455 | -0.0017 | -0.0003 |
| **βt·10-30 esu** | **6.1287** | **269.5747** | **34.9465** | **8.4317** |
| γxxxx·10-36 esu | 53.0513 | 869.1170 | 265.7590 | 65.7514 |
| γxxyx·10-36 esu | 6.8536 | 304.6530 | 120.9770 | 10.3282 |
| γxxyy·10-36 esu | 25.2843 | 394.8960 | 164.2680 | 32.2299 |
| γyxyy·10-36 esu | 16.2456 | 660.8820 | -42.3604 | 17.8745 |
| γyyyy·10-36 esu | 43.6239 | 975.2650 | 143.0850 | 51.8793 |
| γxxzx·10-36 esu | 0.0013 | -20.0601 | 0.0093 | 0.0017 |
| γxxzy·10-36 esu | 0.0006 | 6.1299 | 0.0082 | 0.0008 |
| γzyzy·10-36 esu | 0.0007 | -151.1410 | 20.3638 | 14.3913 |
| γzzzy·10-36 esu | 0.0010 | 3.1779 | 0.0019 | 0.0013 |
| γxxzz·10-36 esu | 14.8580 | -8322.3300 | 35.7917 | 17.8251 |
| γyxzz·10-36 esu | 3.3502 | -4331.3000 | 5.2536 | 4.1349 |
| γyyzz·10-36 esu | 12.5872 | -2089.5600 | 26.1481 | 14.9368 |
| γzxzz·10-36 esu | 0.0006 | 23.1349 | 0.0009 | 0.0007 |
| γzyzz·10-36 esu | 0.0010 | -0.9040 | 0.0023 | 0.0013 |
| γzzzz·10-36 esu | 17.9351 | 22203.5000 | 24.0117 | 19.7581 |
| **γ·10-36 esu** | **44.0139** | **802.7788** | **177.0543** | **53.4745** |

| Table S6. Components of dipole moment, polarizability, first and second order hyperpolarizability tensors for 4M1N molecule calculated with B3LYP method in  6-311+G(3d,2p) basis set for PS | | | | |
| --- | --- | --- | --- | --- |
| Tensor component | Static | Dynamic | Dynamic | Dynamic |
| 266 nm | 532 nm | 1064 nm |
| B3LYP/6-311+G(3d,2p) | | | | |
| μx [Debye] | 2.4581 | | | |
| μy [Debye] | 1.6681 | | | |
| μz [Debye] | 0.0004 | | | |
| **μ [Debye]** | **2.9707** | | | |
| αxx·10-24 esu | 34.6658 | 60.2853 | 42.3656 | 35.9325 |
| αyy·10-24 esu | 2.7092 | 22.3285 | 2.5545 | 2.8308 |
| αzz·10-24 esu | 32.8276 | 65.3349 | 38.5140 | 33.8762 |
| αxy·10-24 esu | -0.0001 | -0.0001 | -0.0002 | -0.0001 |
| αxz·10-24 esu | 0.0011 | 0.0029 | 0.0014 | 0.0011 |
| αyz·10-24 esu | 14.6963 | 16.5555 | 15.2411 | 14.8246 |
| **<α>·10-24 esu** | **23.4009** | **49.3162** | **27.8114** | **24.2132** |
| βxxx·10-30 esu | -3.4389 | -19.5676 | -21.6360 | -4.9182 |
| βxxy·10-30 esu | -0.5450 | -45.7478 | -10.4052 | -1.0440 |
| βxyy·10-30 esu | -0.3330 | -1.8455 | 5.6034 | -0.1233 |
| βyyy·10-30 esu | -3.0035 | -17.9614 | -12.4018 | -3.9222 |
| βxxz·10-30 esu | 0.0000 | -0.0504 | -0.0004 | 0.0000 |
| βxyz·10-30 esu | 0.0000 | -0.0041 | 0.0005 | 0.0000 |
| βyyz·10-30 esu | -0.0002 | 0.0057 | -0.0009 | -0.0003 |
| βxzz·10-30 esu | 0.2625 | -29.2345 | 0.4268 | 0.2984 |
| βyzz·10-30 esu | 0.0323 | -15.5962 | 0.0769 | 0.0370 |
| βzzz·10-30 esu | 0.0000 | -0.0016 | 0.0001 | 0.0001 |
| βx·10-30 esu | -3.5094 | -50.6476 | -15.6058 | -4.7431 |
| βy·10-30 esu | -3.5161 | -79.3054 | -22.7301 | -4.9292 |
| βz·10-30 esu | -0.0001 | -0.0462 | -0.0012 | -0.0002 |
| **βt·10-30 esu** | **4.9678** | **94.0985** | **27.5717** | **6.8406** |
| γxxxx·10-36 esu | 45.6353 | 659.5320 | 203.3860 | 55.8738 |
| γxxyx·10-36 esu | 5.5934 | 183.0460 | 87.4771 | 8.2991 |
| γxxyy·10-36 esu | 20.8559 | 245.5260 | 122.1650 | 26.3314 |
| γyxyy·10-36 esu | 13.2290 | 435.1670 | -27.1080 | 14.5775 |
| γyyyy·10-36 esu | 36.8391 | 658.4450 | 110.6650 | 43.4395 |
| γxxzx·10-36 esu | 0.0012 | 7.1138 | 0.0070 | 0.0016 |
| γxxzy·10-36 esu | 0.0004 | 0.5305 | 0.0058 | 0.0006 |
| γzyzy·10-36 esu | 0.0005 | 35.6531 | 17.1905 | 12.2800 |
| γzzzy·10-36 esu | 0.0008 | 0.6329 | 0.0016 | 0.0010 |
| γxxzz·10-36 esu | 12.8861 | -302.4900 | 29.7275 | 15.3630 |
| γyxzz·10-36 esu | 2.9245 | -578.4930 | 4.8686 | 3.6028 |
| γyyzz·10-36 esu | 10.7746 | -125.5070 | 21.6317 | 12.7084 |
| γzxzz·10-36 esu | 0.0006 | 0.8771 | 0.0009 | 0.0007 |
| γzyzz·10-36 esu | 0.0009 | -0.1484 | 0.0018 | 0.0010 |
| γzzzz·10-36 esu | 15.6500 | 1142.8500 | 20.9482 | 17.2249 |
| **γ·10-36 esu** | **37.4315** | **19.1770** | **136.4095** | **45.0688** |
